# Supplementary material for: High sulfur loading composite wrapped by 3D nitrogen-doped graphene as a cathode material for lithium–sulfur batteries
Source: Royal Society of Chemistry journal article supplement (doi:10.1039/c3ta14921h), 2014-01-01
Supplement: c3ta14921h.pdf [file c3ta14921h.pdf]

## Supporting Information

### High sulfur loading composite wrapped by 3D nitrogen-doped graphene as cathode material for lithium-sulfur batteries

Chao Wang, Kai Su, Wang Wan, Hua Guo, Henghui Zhou, Jitao Chen\*, Xinxiang Zhang and Yunhui Huang\*

<sup>a</sup> Key Laboratory for Advanced Battery Materials and System (MOE), School of Materials Science and Engineering, Huazhong University of Science and Technology (HUST), Wuhan, Hubei 430074, China

Fax: 86-27-87558241; Tel: 86-27-87558241; E-mail: [huangyh@mail.hust.edu.cn](mailto:huangyh@mail.hust.edu.cn)

<sup>b</sup> College of Chemistry and Molecular Engineering, Peking University, Beijing, P. R. China. Fax: 86-10-62754680; Tel: 86-10-62754680; E-mail: [chenjitao@pku.edu.cn](mailto:chenjitao@pku.edu.cn)

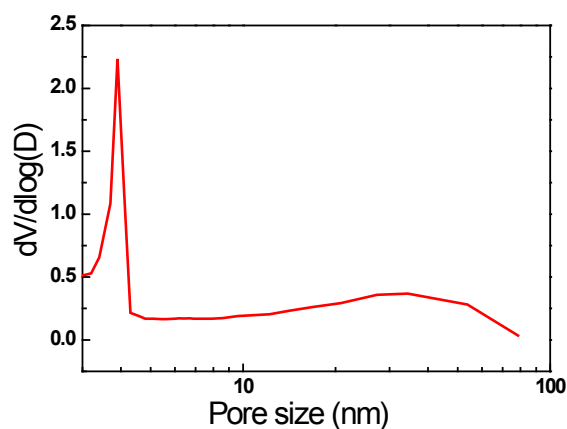

Fig. S1 Pore size distribution of the 3D-NG sample.

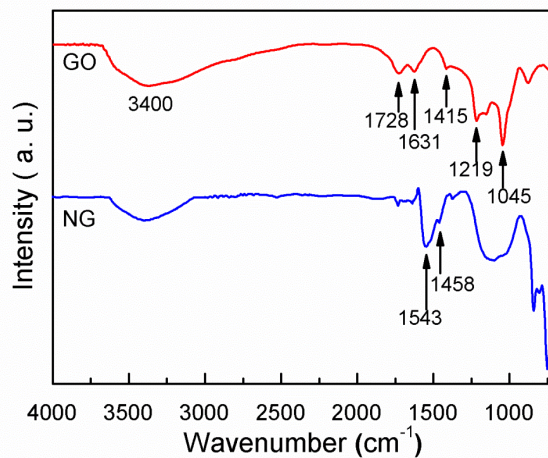

**Fig. S2** FTIR spectra of GO and NG. For GO, the main peaks centered at 1045, 1219, 1415, 1631, 1728 and 3400  $\text{cm}^{-1}$  can be ascribed to alkoxy C–O, epoxy C–O and C–OH, carboxyl O=C–O, aromatic C=C, C=O (carboxylic acid and carbonyl moieties), and O–H stretches, respectively.

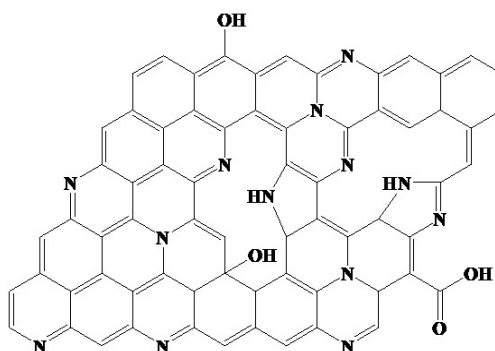

**Fig. S3** Structural scheme of the N-doped graphene.

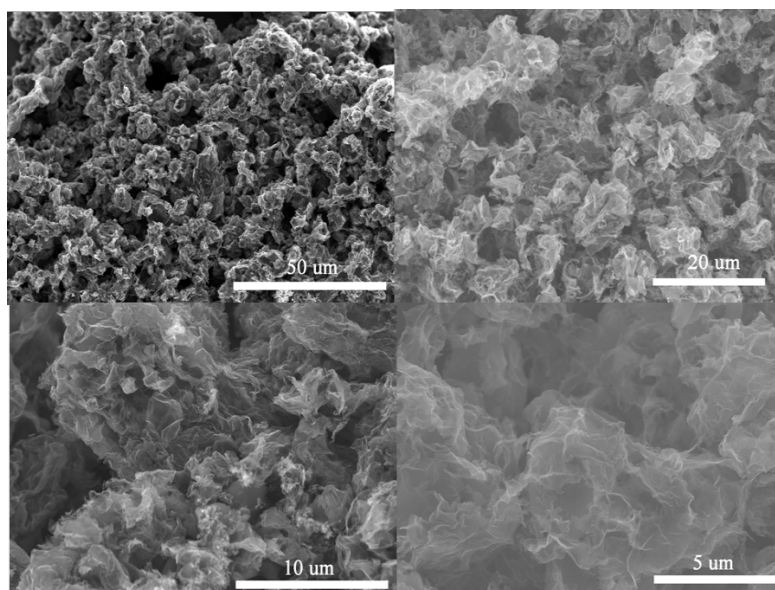

**Fig. S4** SEM images of 3D-NGS with different magnification.

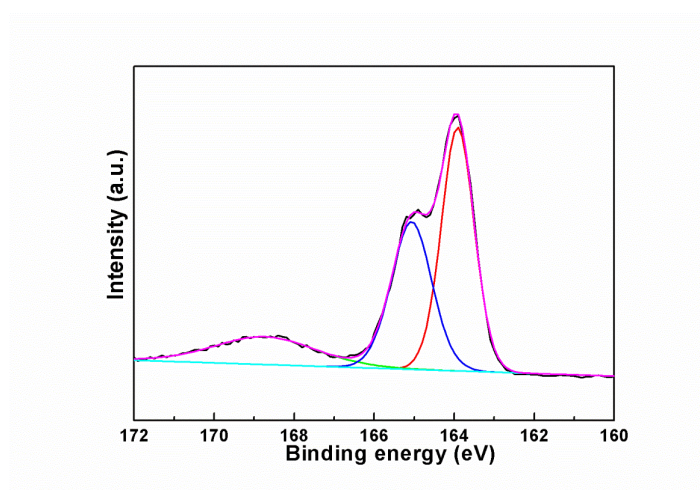

**Fig. S5** XPS spectra of S 2p in 3D-NGS.

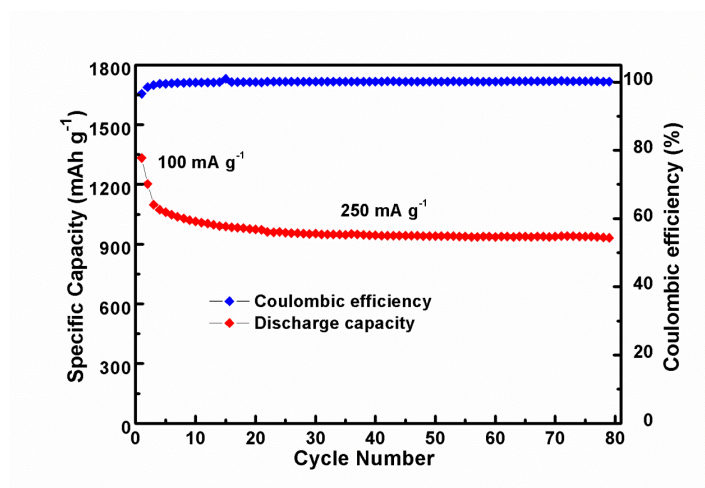

**Fig. S6** Cycling stability and corresponding coulombic efficiency at a current density of  $100 \text{ mA g}^{-1}$  at the initial two cycles and  $250 \text{ mA g}^{-1}$  for 3D-NGS.

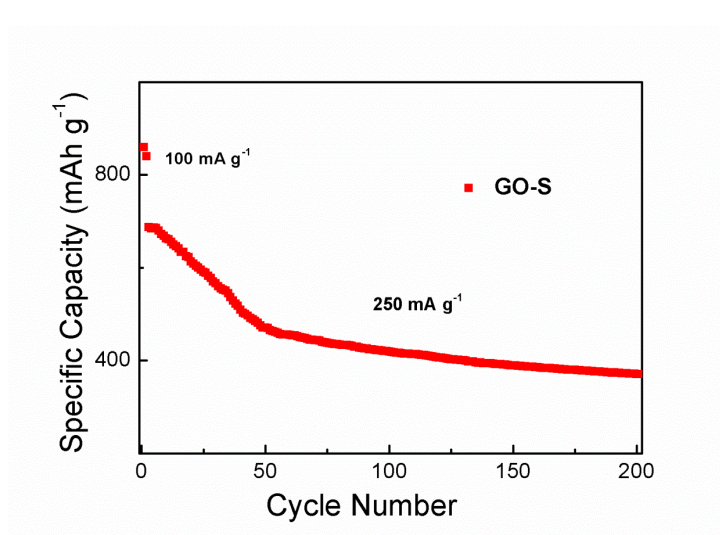

**Fig. S7** Specific discharge capacity at  $250 \text{ mA g}^{-1}$  for GO-S composite.

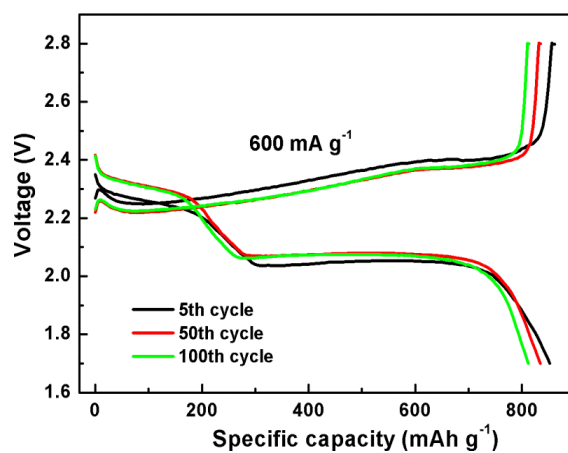

**Fig. S8** Charge and discharge profiles at  $600 \text{ mA g}^{-1}$  for 3D-NGS composite.

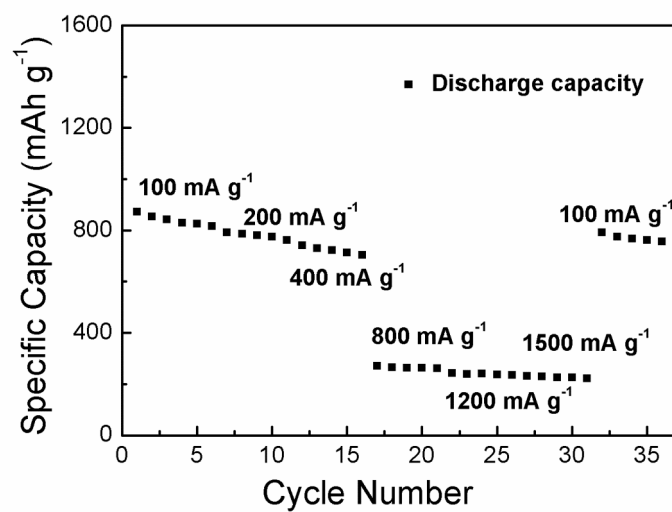

**Fig. S9** Rate performance of GO-S composite.

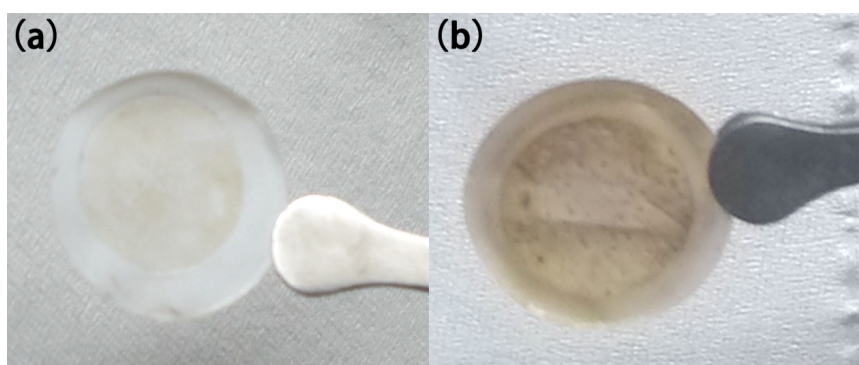

**Fig. S10** Photograph of the separator after running at 1500 mA g<sup>-1</sup> for 200 cycles:  
(a) 3D-NGS, (b) GO-S.
